# Supplementary material for: Enhancement of optical resolution in three-dimensional refractive-index tomograms of biological samples by employing micromirror-embedded coverslips
Source: Royal Society of Chemistry journal article supplement (doi:10.1039/c8lc00880a), 2018-01-01
Supplement: c8lc00880a7.pdf [file c8lc00880a7.pdf]

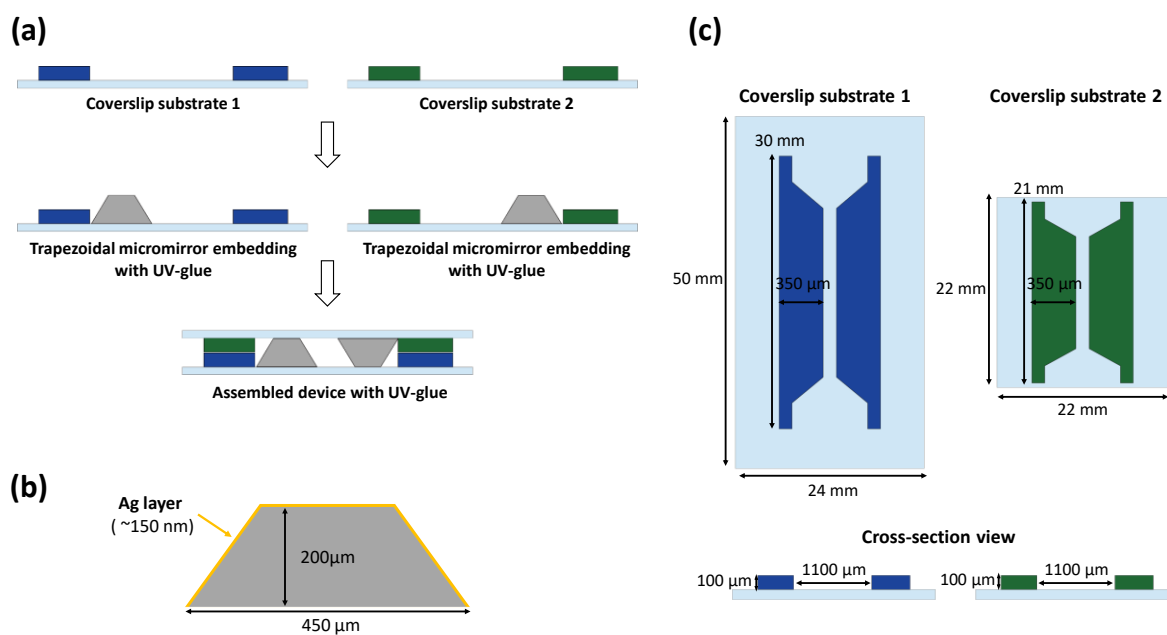

Fig. S1. Trapezoidal micromirror-embedded coverslip device. (a) Fabrication steps. A micromirror is embedded between the parallel columns that are patterned with UV curable polymer on a coverslip. Two micromirror-embedded coverslips are aligned and assembled to form a flow channel. (b) Dimensions of the trapezoidal micromirror. (c) Dimensions of coverslip substrates with two different size.
